# Supplementary material for: Cardiotoxicity of adjuvant chemotherapy with trastuzumab: a Japanese claim-based data analysis
Source: PubMed Central journal article supplement — Open Heart. 2022 Aug 22;9(2):e002053. doi: 10.1136/openhrt-2022-002053 (PMC9403121; doi:10.1136/openhrt-2022-002053), 2022-08-22

## Supplemental material

### Supplementary Table 1. Subgroup-analysis, with and without anthracyclines

A sub-analysis after propensity score matching.

**Abbreviations:** Anthra, anthracyclines; TZ, trastuzumab users; NT, trastuzumab non-users.

### Supplementary Figure 1. Cumulative incidence of post-operative heart failure within 18 months among women with early-stage breast cancer after propensity score (PS) matching. (Subgroup-analysis, with and without anthracyclines)

As a sub-analysis after PS matching, the cumulative incidence of post-operative heart failure within 18 months was presented for the trastuzumab (Trastuzumab, YES) and non-trastuzumab (Trastuzumab, NO) groups, subdivided into those with (Anthra, YES) and without anthracyclines (Anthra, NO).

**Supplementary Table 1. Subgroup-analysis, with and without anthracyclines**

| Anthra[L01D] | Trastuzumab [L01XC03]      |                    |                   | P-value |
|--------------|----------------------------|--------------------|-------------------|---------|
|              | Yes (TZ)<br>(N=414)        | No (NT)<br>(N=828) | Total<br>(N=1242) |         |
| No           | <b>months of CHF(18mo)</b> |                    |                   | 0.03631 |
|              | Events/N                   | 8/414              | 5/828             | 13/1242 |
|              | Hazard Ratio (95% CI)      | 3.10 (1.01 - 9.48) | Reference         |         |
| Yes          | <b>months of CHF(18mo)</b> |                    |                   | 0.00841 |
|              | Events/N                   | 25/591             | 23/1182           | 48/1773 |
|              | Hazard Ratio (95% CI)      | 2.10 (1.19 - 3.70) | Reference         |         |

<sup>1</sup>Logrank p-value;

**Supplementary Figure 1. Cumulative incidence of post-operative heart failure within 18 months in women with early-stage breast cancer. (Subgroup-analysis after PS match, with and without anthracyclines)**

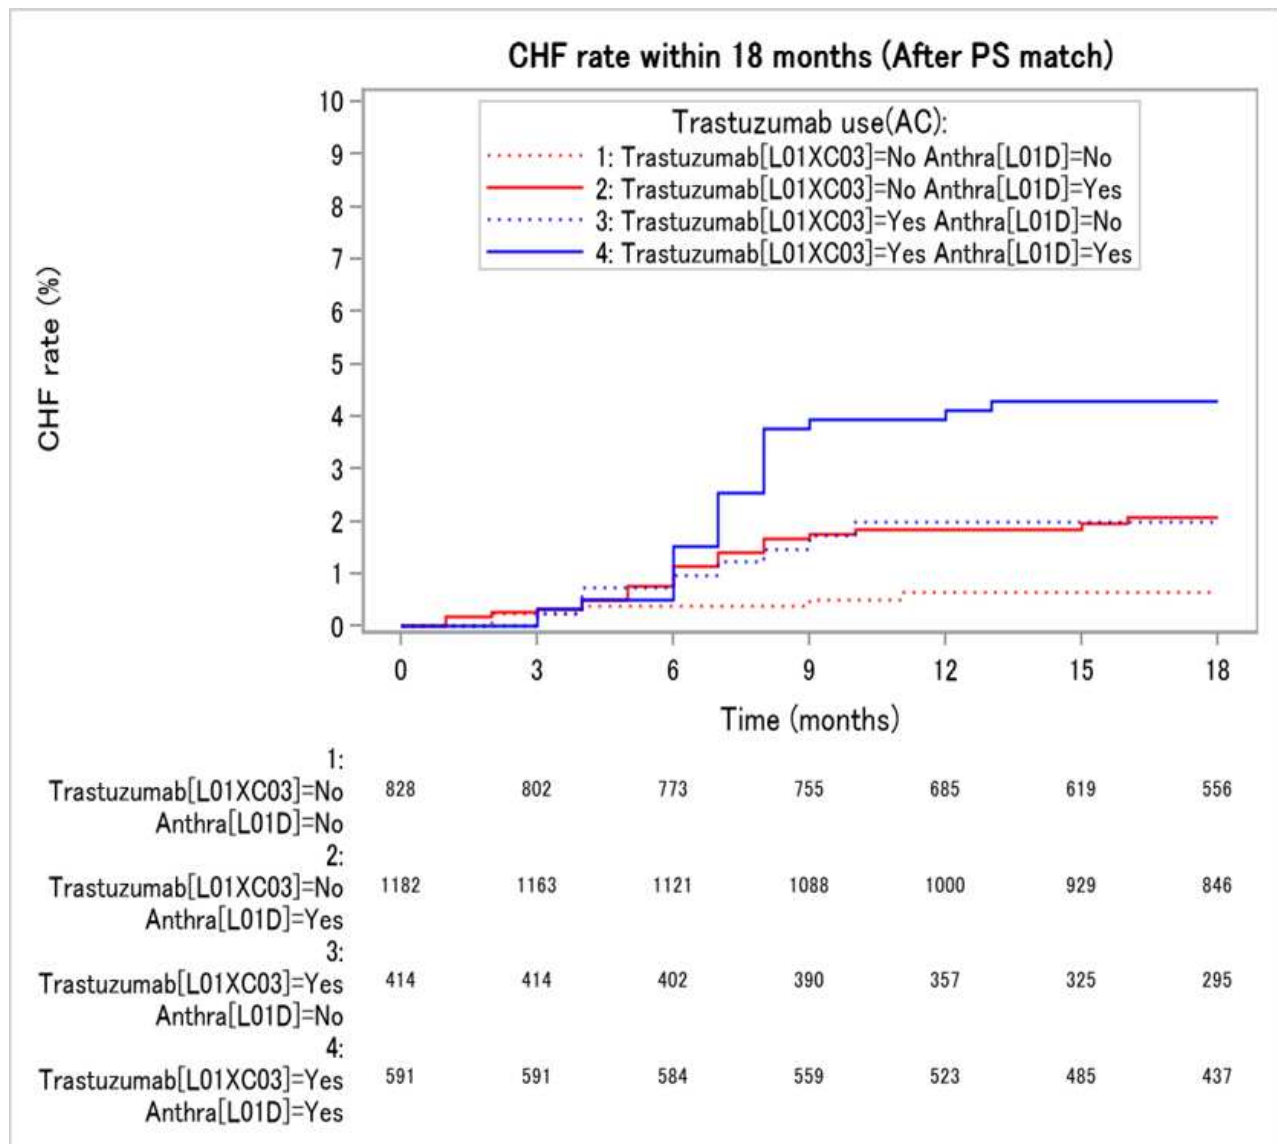

Supplement: openhrt-2022-002053supp001.pdf [file openhrt-2022-002053supp001.pdf]
